# Supplementary material for: Genotypic and environmental effect on male flower production in Cupressus sempervirens clones and selection of genotypes with reduced pollen emission
Source: Front Plant Sci. 2022 Nov 1;13:1032200. doi: 10.3389/fpls.2022.1032200 (PMC9664152; doi:10.3389/fpls.2022.1032200)
Supplement: Supplementary file 1 [file Table_1.xlsx]

## Sheet: suppl tab 1
CANNARA
2012	jan	feb	mar	apr	may	jun	jul	ago	sep	oct	nov	dec	means
T max	11.2	8.5	20.2	19.9	23.5	32.4	35.4	36.4	26.8	22.5	15.8	9.8	21.8667
T min	-1.5	-0.2	3.8	7.4	9.4	15	17.6	18.4	14.5	10.5	7.7	1.2	8.65
T med	4.9	4.2	12	13.7	16.4	23.7	26.5	27.4	20.6	16.5	11.8	5.5	15.2667
rainfall	24.9	20.9	16.6	83.1	67.6	17	5.1	50.2	32.1	100.5	260.8	87.7	766.5	sum
2013	jan	feb	mar	apr	may	jun	jul	ago	sep	oct	nov	dec	means
T max	9	10.3	14.9	21.9	22.2	28.5	32.5	33.3	28.2	22.8	15.3	9.8	20.725
T min	1.8	-0.1	4.7	8.1	10.6	13.4	16.5	16.7	13.3	11.9	6.9	0.5	8.69167
T med	5.4	5.1	9.8	15	16.4	21	24.5	25	20.7	17.3	11.1	5.1	14.7
rainfall	96.1	94.3	125.6	89.8	194.2	96.8	33.7	23.3	94.6	127.5	186.2	16.1	1178.2	sum
2014	jan	feb	mar	apr	may	jun	jul	ago	sep	oct	nov	dec	means
T max	10.9	15.2	17.2	20.5	24.1	29.9	30.2	31.3	26.9	24.3	17.9	12.5	21.7417
T min	3.3	5.3	4	7.3	10.5	14.5	16.8	16.8	14.5	11.9	9	4.7	9.88333
T med	7.1	10.2	10.6	13.9	17.3	22.2	23.5	24.1	20.7	18.1	13.4	8.6	15.8083
rainfall	119.3	106.8	28.7	105.1	126.7	68.2	196.4	70.4	104.2	11.4	183.7	58.4	1179.3	sum
2015	jan	feb	mar	apr	may	jun	jul	ago	sep	oct	nov	dec	means
T max	12.5	13	16.4	21.7	28	31.9	36.3	33.6	27.1	20.8	15.8	10	22.2583
T min	2.3	2.8	5.5	7	12.8	16.2	20.7	17.3	14.8	11.6	5.4	1.1	9.79167
T med	7.4	7.9	11	14.4	20.4	24.1	28.5	25.4	21	16.2	10.6	5.6	16.0417
rainfall	50.7	62.4	93.4	23.5	110.9	37.7	4.4	31.8	8.3	69.6	39.1	2.4	534.2	sum
2016	jan	feb	mar	apr	may	jun	jul	ago	sep	oct	nov	dec	means
T max	11.5	14.9	16	21.8	23.2	28.3	33.4	31.1	27.2	20.9	15.1	11	21.2
T min	2.4	5.3	4.6	7.5	10.3	14.6	17.6	15.8	13.4	10	6.4	0.1	9
T med	6.9	10.1	10.3	14.6	16.8	21.5	25.5	23.5	20.3	15.5	10.7	5.6	15.1083
rainfall	62.9	149.1	45.7	116.5	113.9	68.1	67.1	44	42.4	137	77.4	5.2	929.3	sum
ROSELLE
2012	jan	feb	mar	apr	may	jun	jul	ago	sep	oct	nov	dec	means
T max	12.8	9	19.4	18.4	22.8	29.8	32.1	33.7	26.7	22.6	17.6	12.2	21.425
T min	1.6	0.4	4.5	7.2	9.1	14.8	17.5	18.4	15.6	12.2	9.1	2.3	9.39167
T med	7.2	4.7	12	12.8	16	22.3	24.8	26.1	21.2	17.4	13.4	7.3	15.4333
rainfall	20.2	36.2	6	78.4	85.4	0	0.2	7.2	45.6	101.2	273.8	50.2	704.4
2013	jan	feb	mar	apr	may	jun	jul	ago	sep	oct	nov	dec
T max	11.8	11.1	14.5	19.9	21.1	26.9	31.6	32	27.6	22.6	16.1	13.9	20.7583
T min	2.8	0.8	5.5	7.9	9.6	12.6	16.9	17.7	13.9	14.5	8.4	3.3	9.49167
Tmed	7.3	6	10	13.9	15.4	19.8	24.3	24.9	20.8	18.6	12.3	8.6	15.1583
rainfall	99.6	74	86	42	98.4	27	47.6	38.4	66.8	324.6	110.4	29.8	1044.6
2014	jan	feb	mar	apr	may	jun	jul	ago	sep	oct	nov	dec
T max	13	14.5	16.2	19.5	22.2	28	27.9	28.8	26.1	23.5	18.4	13.7	20.9833
T min	4.9	5.8	5.1	7.5	9.3	14.4	16.2	17	15.1	13.4	10.9	4.9	10.375
Tmed	9	10.2	10.7	13.5	15.8	21.2	22.1	22.9	20.6	18.5	14.7	9.3	15.7083
rainfall	130.8	169.2	66.4	83.2	52.8	37.6	100	40.2	69	59.2	191.4	117.4	1117.2

## Sheet: suppl tab 2
Clones	environments						clone mean	W2 ecovalence	dev.st	CV	regression coeff bi
	c13	c14	c15	c16	r13	r14
2887	4	5.4	3.4	2.2	4	5.5	4.08333	1.18232	1.24646	30.5256	0.910576
2888	5	5.4	4	4.8	2	5	4.36667	8.23309	1.24847	28.5908	0.472585
2890	5	5.4	4.2	4.6	1.4	4	4.1	11.8343	1.41845	34.5963	0.389391
2892	2	5.25	4	4.25	1.5	4	3.5	13.7142	1.44049	41.1567	0.291834
2898	5	5	4.66667	4	3	6	4.61111	5.26211	1.02017	22.1241	0.496359
2899	5	5.33333	4.66667	2.66667	2	5	4.11111	5.97379	1.40897	34.2721	0.746379
2917	4.33333	5.66667	2.33333	2	3	5	3.72222	0.29393	1.49691	40.2155	1.18012
2918	5	5.25	3	2.75	2	5	3.83333	2.60521	1.41126	36.8156	0.958398
2920	4.5	5.25	4	5	2.8	7	4.75833	8.42117	1.40015	29.4252	0.586087
2926	4.8	5.4	2.2	2	1	6	3.56667	6.75704	2.08391	58.4273	1.43238
2928	5	6	4.25	3.75	4	3.75	4.45833	4.63876	0.886237	19.8782	0.455634
2932	4.5	5.25	2	2	5.25	5	4	4.42777	1.57321	39.3303	0.995435
2939	4.5	5.6	3.2	2.4	4.5	7	4.53333	3.38246	1.64641	36.3179	1.13406
2940	5	5.4	3.4	2.2	3	5	4	1.12495	1.30843	32.7109	0.963505
2950	6	6.5	3	2.25	4.33333	5.33333	4.56944	2.17763	1.68854	36.9528	1.25296
2951	5	6.75	4.75	4.75	4	4.33333	4.93056	5.59105	0.95948	19.4599	0.438405
2952	6.75	6.75	3.25	2.75	5	6	5.08333	3.03132	1.74404	34.3089	1.25912
2966	5	5.25	2	2	2.25	5	3.58333	1.96695	1.64823	45.9972	1.22417
2984	5	6	5	5	1	1	3.83333	33.4431	2.2286	58.1374	-0.0367399
2990	6	7	3	3	5	5	4.83333	2.63497	1.60208	33.1465	1.13577
2992	1	3.2	1.2	1.2	4.5	5	2.68333	13.0875	1.79824	67.0152	0.692059
3014	6.8	7	4.2	2.2	6	6.2	5.4	5.43379	1.85472	34.3467	1.23351
3017	3	4	3	2.4	2.33333	5	3.28889	3.22005	1.02992	31.3152	0.629896
3025	2.2	5.2	2.6	1.6	4.2	6	3.63333	6.73354	1.76824	48.6671	1.05482
3035	5	6	3.4	1.4	4.75	5.4	4.325	3.25067	1.67384	38.7016	1.17066
3036	5	5.4	5	4.8	3	6	4.86667	6.88275	1.00929	20.7388	0.388447
3037	6	6.2	3.6	2.8	5.6	5	4.86667	3.53704	1.37792	28.3134	0.871319
3041	4.6	5.4	2.8	2	4.33333	5	4.02222	1.21227	1.33178	33.1105	0.977271
3044	6	6	2.4	2.2	4	4.66667	4.21111	3.09576	1.67195	39.7032	1.17834
3045	6.6	6.2	3.4	1.8	6	6.5	5.08333	7.48239	2.00042	39.3525	1.28087
3053	4.2	7.4	2	1.2	3	4	3.63333	5.85021	2.17409	59.8373	1.60861
3054	5	5.6	3.6	4	4	5.5	4.61667	1.3018	0.858875	18.6038	0.648778
3071	5	6.8	2.2	1	3.25	4.75	3.83333	4.26485	2.09944	54.7681	1.60801
3075	2	2.5	1.5	1.25	1	2	1.70833	3.4061	0.55715	32.6137	0.384419
3077	6	6.75	3.75	3.5	4.25	5	4.875	1.41021	1.2918	26.4985	0.932241
3078	6.33333	7	2	2.33333	5	6	4.77778	5.73467	2.12568	44.491	1.55093
3080	6.66667	6.66667	3	1.66667	7	7.6	5.43333	13.5648	2.46171	45.3075	1.54328
3081	6.6	6.6	3.8	3.4	6.25	6.8	5.575	3.26666	1.54523	27.7172	1.04062
3082	6.5	7.5	2.75	2.25	7	7.4	5.56667	11.0115	2.40659	43.2321	1.61881
3083	4.25	6.5	1.25	2.25	3.6	5	3.80833	2.98922	1.89088	49.651	1.42812
3086	5.5	5.5	3	2.75	6.25	6.8	4.96667	6.59095	1.6946	34.1194	0.984223
3087	3.5	4.5	1.75	1	3	5.6	3.225	2.7644	1.70404	52.8384	1.23277
3088	5.6	6.2	2.4	2	5.5	5.75	4.575	4.82283	1.8595	40.6449	1.27713
3091	4	5.5	2	1	2.25	5.75	3.41667	3.18954	1.96638	57.5527	1.50641
3092	3.75	5.75	2	1.5	1.5	6	3.41667	4.89217	2.07766	60.8095	1.54054
3097	2.6	4.8	1.6	1.4	5.2	6	3.6	9.90373	1.9799	54.9972	1.10447
3098	3.75	6	2.25	1.25	4.2	6	3.90833	3.92684	1.93272	49.4513	1.41954
3099	3.4	7.4	3	1.8	1.5	6	3.85	9.01369	2.36114	61.3284	1.67582
3104	3	4.6	2.2	2.6	1.33333	5.66667	3.23333	4.98073	1.60762	49.7202	0.995077
3106	6.75	7.5	3.5	3.25	7	7.2	5.86667	5.9002	1.94722	33.1913	1.31405
3111	6	7.2	2	2.6	4	5	4.46667	4.39881	1.99466	44.6566	1.46594
3112	6	6.25	2.5	2.5	4	5	4.375	2.38445	1.65643	37.8612	1.20659
3114	5.2	5.8	2.2	2	4	6	4.2	2.2872	1.77088	42.1637	1.33491
3119	6	7.33333	3	5.33333	2.5	4.5	4.77778	10.5148	1.83081	38.3192	0.889285
3121	6	7.4	4.2	5	5.5	6	5.68333	1.35596	1.08151	19.0295	0.780057
3123	5	7	5	5.25	4.33333	6	5.43056	3.43144	0.937515	17.2637	0.560048
3124	6	7.4	4	4.2	5.6	6	5.53333	0.875653	1.26912	22.9359	0.947461
3125	6	7.4	5	3.6	3.8	6	5.3	2.09958	1.45739	27.498	1.03117
3126	4.6	7	3	3.2	3	5	4.3	1.79856	1.57861	36.7118	1.16464
3127	5	7	2.6	2.8	1.6	7	4.33333	8.68735	2.34492	54.1136	1.67238
3129	4.4	6	4	3.6	5.6	6	4.93333	2.84953	1.06333	21.5539	0.674791
3130	6	7.4	4.6	5	4	5.66667	5.44444	2.69658	1.19827	22.009	0.779453
3131	6	7	3.75	3.25	4	7	5.16667	1.47304	1.70049	32.9127	1.30951
3134	5	7.6	4.8	5.4	4.4	6	5.53333	3.62028	1.15007	20.7844	0.686589
3135	5.5	7.4	5.2	5.6	3.6	6	5.55	5.49941	1.22923	22.1482	0.628147
3137	6	7.4	6	6	4.5	6	5.98333	5.77521	0.917424	15.333	0.40232
3138	5	7.4	6	6	2.4	6	5.46667	14.304	1.68602	30.8418	0.494345
3141	6.4	6	6	6	6.4	7	6.3	6.81563	0.394968	6.26934	0.123735
3142	6	7.8	6	6	5.6	7	6.4	2.72992	0.829458	12.9603	0.544267
3143	5.4	7.4	6	6	4.2	5.8	5.8	7.50515	1.03537	17.8513	0.36627
3145	5	7.4	6	6	4.2	6	5.76667	7.92282	1.08382	18.7946	0.372234
3148	5	8	6	6	4	6.5	5.91667	7.92568	1.35708	22.9366	0.579962
3150	5	6.66667	4.66667	4.33333	4	5.33333	5	2.21683	0.942809	18.8562	0.638871
3152	5	6	5	4	3	5	4.66667	4.83044	1.0328	22.1313	0.531351
3153	5	6	3.8	4	3.33333	4.66667	4.46667	2.35137	0.96148	21.5257	0.641566
3156	7	6	4	5.5	6.4	6.8	5.95	5.83703	1.09864	18.4645	0.512342
3161	6.6	6.6	3.6	3	7	7	5.63333	6.76525	1.82611	32.4161	1.11768
3162	4.6	6	2.8	1.6	4.75	5	4.125	2.59877	1.61423	39.1329	1.15021
3163	4.6	7.8	5	3.6	3	7	5.16667	6.06105	1.88644	36.5118	1.2314
3164	4.4	7.5	2	1.75	3.75	6	4.23333	5.13895	2.24537	53.0401	1.75114
3165	5	6.6	3	2.2	3.6	4.6	4.16667	1.33411	1.57184	37.7241	1.18694
3167	4	7.6	2	2	4	6	4.26667	5.44105	2.2151	51.9164	1.69022
3170	5	6.6	4	4	4	5.6	4.86667	0.71656	1.07827	22.1562	0.817736
3172	4.5	5.66667	2.66667	2	3.5	6	4.05556	1.22602	1.61475	39.8157	1.23631
3173	4	7.6	1.2	1	2.6	4.4	3.46667	8.16241	2.45818	70.9091	1.87467
3174	3.8	6.4	1.8	1.2	3.2	5	3.56667	2.62717	1.94902	54.6453	1.52028
3176	3.2	3.8	1.6	1.4	5	3	3	8.53386	1.35647	45.2155	0.541527
3177	4.6	6.4	2.6	1.6	5.6	5.4	4.36667	5.36064	1.87368	42.9086	1.2601
3178	3.4	6.4	2.4	1.2	4.2	5.8	3.9	4.52325	1.98696	50.9476	1.44862
3180	3.6	4	1.25	1.5	5.4	6	3.625	11.0211	1.95391	53.9009	1.00294
3186	2.2	5.4	2	2.6	3.5	6	3.61667	5.66646	1.7046	47.1318	1.05245
3188	4.4	6.6	2.4	2	5.6	6	4.5	5.25216	1.92562	42.7915	1.32837
3192	5	6.4	4	5	4.25	6	5.10833	2.3807	0.943619	18.4721	0.629131
3193	5	6.4	3.8	3.6	4.5	6	4.88333	0.192966	1.14266	23.3991	0.89495
3194	6.75	8	4	5	4.33333	5.66667	5.625	3.39987	1.52366	27.0872	1.01168
3197	6.8	6	3.2	1.8	3.33333	5.33333	4.41111	5.60156	1.925	43.6398	1.30585
3202	5	6	3.4	3.4	2	4.2	4	4.33148	1.39714	34.9285	0.838417
3208	3.75	6.25	1	1	5.8	6	3.96667	12.8151	2.46408	62.1195	1.59366
